# Supplementary material
Source: Elsevier journal article supplement (http://fieldlab.org/Reprints/Reprints_files/mmc1.pdf)
Supplement: mmc1 [file mmc1.pdf]

```

1 MUSCLE (3.8) multiple sequence alignment
2
3
4 EgracilisZ1 -----
5 Tborrelli -----MDHVD
6 Pserpens -----MSTDRQDVS
7 Lbrasiliensis -----MEKDMLSLYP
8 Ltarantolae -----MEGPRTTHTGDTSEKEMLSPCS
9 Lmexicana -----
10 Lmajor -----
11 Linfantum -----
12 Bsaltans -----MDHAD
13 Tvivax -----MDYMD
14 Tcongolense MVKGASSIIFFFRSPLLKVLFGSTAGRKKRNRHLSNTGRIAAACALLAGYARQDLMHDID
15 Tbrucei -----MDHID
16 Tbgambiense -----MDHID
17 Tcarassii -----MDHVD
18 Ttheileri -----MDHVD
19 Tgrayi -----MDHVD
20 Tcruzi -----MDHVD
21
22
23 EgracilisZ1 -----
24 Tborrelli LTVGSD---SEFLTAISLRMP-----
25 Pserpens LVSSVNNGEDEPSMTVSTSGPSGRMPRVISAVSSVSKEFLPGDIVSGGVGLKNLTTSSYI
26 Lbrasiliensis SHLQERRASGPPVLHVNLVCG-----
27 Ltarantolae NHIHERRSCGPPVLRVHVLRG-----
28 Lmexicana -----
29 Lmajor -----
30 Linfantum -----
31 Bsaltans IAASPELTGG-PLTQLHVRIP-----
32 Tvivax FASARETGPLLSPATISVSIP-----
33 Tcongolense ITEVRELGGEVSLKTLNISIP-----
34 Tbrucei LAEEREMNGDPIMVLNVSVP-----
35 Tbgambiense LAEEREMNGDPIMVLNVSVP-----
36 Tcarassii VVG TREMDSASVQRTLHVITIP-----
37 Ttheileri LASAREMGSSPAFTTLHVSVP-----
38 Tgrayi VAG TREMGAAASL TTHLVFIP-----
39 Tcruzi VAGTRDMGSTPSL TALQVIIP-----
40
41
42 EgracilisZ1 -----
43 Tborrelli -----AFANSKG-----
44 Pserpens VSAGDTQALGDSLHPSTSAIIPSSSQRRSLDTNITERYYPFNATRHPIRTLSTSVSLNA
45 Lbrasiliensis -----LSNEDITSSSFVA---TIGR-SSTGAGTLNRVNPTSSIPASATAFASRRAR
46 Ltarantolae -----MPKGD TTSDFSFS---TFDRTTSTGTGSPNRAGPLSSLPAS---ASRRTS
47 Lmexicana -----
48 Lmajor -----
49 Linfantum -----
50 Bsaltans -----FNAAGDGGGSSAG-----
51 Tvivax -----YTAAVSSSSSNT-----CNSSVSG
52 Tcongolense -----FTSSSPRNDSGD-----
53 Tbrucei -----YSANSSDRKSNVS-----
54 Tbgambiense -----YSANSSDRKSNVS-----
55 Tcarassii -----SSKNCSGHFPSVT-----
56 Ttheileri -----YSSNNSTYNSNSN---IYNNNNNSSHINNNSNASGSTSGVAAYGGSTSPRT
57 Tgrayi -----YSNSATNKTSNSG-----AAGVPAVSSSFTPRTA
58 Tcruzi -----YGSNSNNNNNNNN-----NNNNNFYSGGVCFTRCP
59
60
61 EgracilisZ1 -----LKPVSEWVQDDVVTHCVS--CH
62 Tborrelli -----LGGGFTALRPPRTN--DVYCMPREKWIPDARVVECMASECR
63 Pserpens MNPPQLLGLGAI FSSSVHPQNGDARSFAKPTLDPASVRWCSPDHWVPDAQVVNCPMAPDCK
64 Lbrasiliensis NGSLSPLRSFPSSSVANGTSPVQSSTLAKPVL DLSQVRCIPI DQWIPDAHVVNCPMAPDCG
65 Ltarantolae DGVQSTMGP AVNACSTGAAGIVQSSTLAKPVL DLSQVRCIPLDQWVPDAHVVNCPMAPDCS
66 Lmexicana -----MSGTGVVQSSTLAKPVL ELSQVRCIPLDQWVPDAHVVNCPMAPDCS
67 Lmajor -----MSGNGAVQSPALAKPVL DLSQVRCIPLDQWVPDAHVVNCPMAPDCS
68 Linfantum -----

```

```

69 Bsaltans -----RYHQRTNSTNPALYSRQTIAKPTLNRTVV-LMPSSRWIADNQVACCTAPECQ
70 Tvivax NGDNDGVTSSSTCLSSSGTIAHKFTRLTKPTLDPHIRFCPPSQWVPAQIMTCMTHCECN
71 Tcongolense -----GTNGDSKITGLSTSATTW--LTKPVLDPWRICLCPKRWVWVDMQVTCMAHECN
72 Tbrucei -----SPLLSKCASKQTSQVMW--LTKPTLDPSCIRLCPLRRWVWVDMQVTCMAHECN
73 Tbgambiense -----SPLLSKCASKQTSQVMW--LTKPTLDPSCIRLCPLRRWVWVDMQVTCMAHECN
74 Tcarassii -----NLSPPQSSSLQRTLAKPTLDPSCIRFCPLDRWVWVDMQVTCMAHECN
75 Ttheileri PHVHSLAGSMAASSVMNPTSNTSRSLAKPTLDTSHIRLCSEECWMPDAQVMTMAHECN
76 Tgrayi TSAGTAVASSAALNGGGTTASSRWM-LAKPTLDPSCIRFCPETCWVWVDMQVTCMAHECN
77 Tcruzi SLTANVTRSLSVSCGGDSSFSNVWSLAKPTLDPHIRFCPEGCWVWVDMQVTCMAHECN
78
79
80 EgracilisZ1 AAFSIFNRKHHRCVCGHIFCHFCSAKTLP-----
81 Tborrelli QQFTFFTRRHRCVCGRIYCAKCSSESIHR-----YVDTNFTQRSDVNYVQLSA
82 Pserpens MPFSIFTRKEHCKLCGRVFCYSCCSNEVEILTDGSPCSSHSRNASGNIKGSEMLSSNGFP
83 Lbrasiliensis NSFSLFNRKHHRCMGRVFCSSCCNLLVYIPAAVAQNAASSSTDMAMGCTATSYPVS
84 Ltarantolae NSFSLFNRKHHRCMGRVFCSSCCNHLVSIPAVVSRANGSPEG-MAVGGYVATSNASII
85 Lmexicana NSFSLFNRKHHRCMGRVFCSSCCNLLVYIPAAVNRANSSTEGPAAV-SYVATANTSMS
86 Lmajor NSFSLFNRKHHRCMCGHVFCSSCCNLLVYIPAAVNKRANSSTEGAAAAGSYSAMTNTSLS
87 Linfantum -----
88 Bsaltans LPFTIFNRKHHRCVCGNIFCANCSSHTLPA-----
89 Tvivax VFFSFFNRRHHCHICGRVFCACCRRMVNL-----GDYPRMSSPNS
90 Tcongolense VAFTMFNRRHHRCRCGRIFCFACCSNTVRV-----PSGPLHAASHYAGAD
91 Tbrucei VAFSMFNRRHHRCVCGRVFCACCSETVNA-----LVQSALEVQSNPIE
92 Tbgambiense VAFSMFNRRHHRCVCGRVFCACCSETVNA-----LVQSALEVQSNPIE
93 Tcarassii VFSFLNRRHHRCICGHLFCAACSSHTVTV-----PSTASVAMSGRSS
94 Ttheileri VFSFLNRRHHRCVCGRIFCAACCSHFITL----RGDNHTGTTGSLVTSFLDGVESPTA
95 Tgrayi VFSFLNRRHHRCVCGRIFCAACCSHIITA--LNYHNNDSYYSQNRQLQNSSYTNSMA
96 Tcruzi VFSFLNRRHHRCRCGRIFCAACCSHVITI-----RSTRGGLSASCALSG
97
98
99 EgracilisZ1 -----
100 Tborrelli EDDHHQHLAADT----ETAPNGGPLVSSSSTTVRSIADNNINSNNI----NSNNRKT
101 Pserpens HPRSHSQIANET----GSNPVTGSSSYPKRSESTGFSNVTTVHTAMGNAVAISTATS
102 Lbrasiliensis SAITSELQQFHRACARDGSAPSNGMRRGSQSPITSAPDLFPATSMTHHGSLVVCGEENG
103 Ltarantolae PAATSEPQSLNRASAGEGSASSTGMRRGPQAQVAQGESEFFASSATLLSGTLPVSSDNG
104 Lmexicana SAATPEPQQFNACASDGSASSNGMRRGSQAHAQAQADVSSASSTLFPGPLHVCNDNG
105 Lmajor SVVTPPEPQQFNACASDGSALPNGMRRGPQAPAAQLDVSSASSALLPGPLPVCSDNG
106 Linfantum -----
107 Bsaltans -VGAEDA AVNK-----SIAAAQ
108 Tvivax RSDGMNGVHLNA----VAPQSSVRTSVASSIFSPR-----YAPQREFQ
109 Tcongolense NARGVDRMPLPN----GEAVAREAGRDDSD-----LDQNKQN
110 Tbrucei ACGGVDKTSLPS----GRVSGTDIANGEDN-----ISQQQQQG
111 Tbgambiense ACGGVDKTSLPS----GRVSGTDIANGEDN-----ISQQQQQG
112 Tcarassii PCHGPPKNLSRR----NTAPGTLPAQPTASPVQTSTASS-----MSCISAAT
113 Ttheileri SSTTPHRIGDKVHGQRNSILSSTRPLQSSPSQSLQQIGSS-----YHQRPQSQ
114 Tgrayi QCTVSCGDALDSF----GSPSTVQSHRGDGSPLGACST-----PSSARLHQ
115 Tcruzi AEGQETATSLPA----ILGATDDNSAGGASSNPNSFFYPSQA-----QLVQQQQH
116
117
118 EgracilisZ1 -----PAPSY-----ESVRVCDNCHADHQLAIVKNDFERKVENAR
119 Tborrelli PPS---MASPLSPV-----TNEMRVCKECCYYSYQLAICRRDVATGLPRRR
120 Pserpens PSC---AASVDNVL----SMGTPLPQTSKGTLYRVCNECFYETQLVVSVRG-EDGSPRRK
121 Lbrasiliensis NLP---SSALNSVAMTTAPSPSSPSTQTSVPCRVCASCSEYEVQLVVSTRQ-ENGEPRRR
122 Ltarantolae HLS---FNSLTAPS-----SVPCRVCSCSYEIQLVVSARQ-ENGEPRRR
123 Lmexicana HLTSNALTSPSTVTAVTTLPSLLSPSTQAAVPCRVCASCSEYEVQLVVSTRQ-ENGEPRRR
124 Lmajor HPPSNALTAPS AVT---ALPSSMSPSTQAAVPCRVCASCSEYEVQLVVSTRQ-ENGEPRRR
125 Linfantum -----
126 Bsaltans QVA---ANNNSNAS-----TTVRVCAECFYEHQLVVVRRV-NEGLVRRR
127 Tvivax SQQ---LACSTVSP-----GSCRICTSCHYETQLVVSRRG-PNGGLRRK
128 Tcongolense QPQ---QVDYTTMT-----AYRICTSCHYEIQLVIPP RR-CNGEVRRK
129 Tbrucei VQV---FMNPTTVA-----AYRVCFACHYEVQLVVSRRD-RNGEVRRK
130 Tbgambiense VQV---FMNPTTVA-----AYRVCFACHYEVQLVVSRRD-RNGEVRRK
131 Tcarassii TTT---TTATAPT-----STYRICSSCNYEIQLVVARRD-ENGEVRRK
132 Ttheileri QQQ---QLQPSGSS-----SFSTTHRICACYYELQLVVSRRD-HTGEARRK
133 Tgrayi QQQ---FVTSSPTT-----TCRVCSACHYELQLVVP RR-HNGEARRK
134 Tcruzi STS---HLEPTATT-----TTHRICACYYEIQLVVP RR-QNGEVRRR
135
136

```

|     |               |                                                                                                      |
|-----|---------------|------------------------------------------------------------------------------------------------------|
| 137 | EgracilisZ1   | DRGALACL SREVMERVLAF L P P W L V H V A P L V S R D F Y F L A R S N A L W K P L Y E A R W R G L P V - |
| 138 | Tborrelli     | CRGELKMIQRARIVDICSFLSLKDLFNVS-LVSSDFYFITRDNNLWVYFNAMRWEGYNNN                                         |
| 139 | Pserpens      | CRGQLKMFQRALLVNVLSFLSLRDLLETA-LVSSDFYFMSRDNIWYQYNTARWLKETEN                                          |
| 140 | Lbrasiliensis | SRGELKMIQRVLLVNIMTFLTRDLANVS-LVSADFYFMSRDNIWYQYNMTRWAQESE-                                           |
| 141 | Ltarantolae   | SRGELKMIQRVLLINVMSFLTRDLANVS-LVSADFYFMSRDNIWYQYNMTRWAQEA-                                            |
| 142 | Lmexicana     | SRGELKMIQRVLLVNVMSFLTRDLANVS-LVSADFYFMSRDNIWYQYNMTRWVQEA-                                            |
| 143 | Lmajor        | SRGELKMIQRVLLVNVMSFLTRDLANVS-LVSADFYFMSRDNIWYQYNMTRWVQEA-                                            |
| 144 | Linfantum     | -----                                                                                                |
| 145 | Bsaltans      | ARGHLKMFQWPLIVNILSYLSSELLCVS-AVSSDFYFMSRDNLWFTHNMQQWGASMA-                                           |
| 146 | Tvivax        | CRGELKMIQWSLLVRILSFLPMEDLLEVS-LVSSDFYFMSRDNIWLRHNMSRFAMEKE-                                          |
| 147 | Tcongolense   | CRGELKMLQRLLLVRIVSYLSMEDLLKVS-LVSSDFYFMSRDNIWYRYNMTRCVREEE-                                          |
| 148 | Tbrucei       | CRGELKMLQWSLLVRVLSYLTMEELLGVS-LVSSDFYFMSRDNIWYRYNMTRCLREEE-                                          |
| 149 | Tbgambiense   | CRGELKMLQWSLLVRVLSYLTMEELLGVS-LVSSDFYFMSRDNIWYRYNMTRCLREEE-                                          |
| 150 | Tcarassii     | CRGELKMLQWPLLVRMLTYLSRPDILQVS-LVSSDFYFMSRDNIWYHYNMARCKEEEL-                                          |
| 151 | Ttheileri     | CRGELKMLQWSLLVNMLTYLSMHDLLEVS-LVSSDFYFMSRDNIWYQYNLAQYQQKEK-                                          |
| 152 | Tgrayi        | CRGELKMMQWPLLVRMLS YLTMHDLLEVS-LVSSDFYFMSRDNIWYQYNMARCWQVE-                                          |
| 153 | Tcruzi        | CRGELKMFQWSLLVKVLSYLSMHDLLEAS-LVSSDYFISRDNIWYQYNMAQRQKEV-                                            |
| 154 |               |                                                                                                      |
| 155 |               |                                                                                                      |
| 156 | EgracilisZ1   | -----                                                                                                |
| 157 | Tborrelli     | NGERTSKERTEEDTRSSTPTSIGSYG-----YRP-----                                                              |
| 158 | Pserpens      | PYFSFTGDTNHMLTVAANSASASGGIRYWFS AHDNYYKSSSSPSASSALTIALDGSSASV                                        |
| 159 | Lbrasiliensis | -----LPRLSSLKSHAEASRTQQQKGLSWYASSSGSAARSSLAED-----                                                   |
| 160 | Ltarantolae   | -----LPRLSTLNSRAAASQMQRAPSWYAYSSVSGVLNSFADD-----                                                     |
| 161 | Lmexicana     | -----LPRLSSLNSRAAASRMQQQRGPSWYTYSSGNVARSSLIDD-----                                                   |
| 162 | Lmajor        | -----LPRLSSHNSRAAASRMQQQRGPSWCTYSSGSGPRSSLVDD-----                                                   |
| 163 | Linfantum     | -----                                                                                                |
| 164 | Bsaltans      | -----QEKT TTTTRKGSNATAAST-----AAQ-----                                                               |
| 165 | Tvivax        | -----IQRTVMKTVEGTSALLKQNS-----HGR-----                                                               |
| 166 | Tcongolense   | -----VQRMLTMTVESPNSTRKWRS-----TGK-----                                                               |
| 167 | Tbrucei       | -----LQRMLSTTLGSRNSTRRQRL-----PQK-----                                                               |
| 168 | Tbgambiense   | -----LQRMLSTTLGSRNSTRRQRL-----PQK-----                                                               |
| 169 | Tcarassii     | -----QLKLPLALPSLRRLR-----SLT-----                                                                    |
| 170 | Ttheileri     | -----ELKIPTASNYFNPSLRHLLN-----                                                                       |
| 171 | Tgrayi        | -----LKIPTTRSSSSSFLRRRL-----LN-----                                                                  |
| 172 | Tcruzi        | -----QLRIPRRQNSSLSLRRFL-----QRQ-----                                                                 |
| 173 |               |                                                                                                      |
| 174 |               |                                                                                                      |
| 175 | EgracilisZ1   | -----NPQQTNSRETNWVYQTYQRQHLSDAVMSNSRLRM                                                              |
| 176 | Tborrelli     | -----ISRDTSATGFLKGVTPSDGGE--ISNHCRYNYTQFLQYCTLLENARCGGLANFAT                                         |
| 177 | Pserpens      | VEGSIKFPRAPVLEDATVLTQGEAFKRVISLHARYNYTQFLDFARRQEMARCEGLWFSV                                          |
| 178 | Lbrasiliensis | -----MFNSAPVIQDAAALSESEAAKRVISLHARYNYTQFLDFARRQEMARCEGLSSFSL                                         |
| 179 | Ltarantolae   | -----MFSSAPVIQDATALSESEAAKRVISLHARYNYTQFLDFARRQEMARCEGLSSFSL                                         |
| 180 | Lmexicana     | -----MFPSAPVIHDATALSESEAAKRVISLHARYNYTQFLDFARRQEMARCEGLSSFSL                                         |
| 181 | Lmajor        | -----MFSSAPVIQDATALSESEAAKRVISLHARYNYTQFLDFARRQEMAWCEGLSSFSL                                         |
| 182 | Linfantum     | -----MARCEGLSSFSL                                                                                    |
| 183 | Bsaltans      | -----KGGKQALVVS----VAAPLSKVVISLHARYNYTQFLDFARRLEGARCQGLSSFSA                                         |
| 184 | Tvivax        | -----QRREIPFSTDIDDIVSADALKPSISLNARYNFTQFLDFTRRQETTRCKGLSCFAV                                         |
| 185 | Tcongolense   | -----ITRELSFNDFDSITSADAAPKPAISLHARYNFTQFLDFTRRRREATRCKGLSCFSV                                        |
| 186 | Tbrucei       | -----QLGELTFGTD FDSITSAGA AKPTISLNARYNFTQFLDFTRRRREATRCKGLSCFSV                                      |
| 187 | Tbgambiense   | -----QLGELTFGTD FDSITSAGA AKPTISLNARYNFTQFLDFTRRRREATRCKGLSCFSV                                      |
| 188 | Tcarassii     | -----RQNQKIVNTDLGDVAADDAKRVISLHARYNFTHFLDFARRHEMSRYKGLSSFAV                                          |
| 189 | Ttheileri     | -----RHKVRAFRTDFEDITPTDASKRVISLHARYNFTQFLDFARRQEMARCKGFLSFSV                                         |
| 190 | Tgrayi        | -----RAKPQTFLEFGDIIPDASKRVISLHARYNFTQFLDFARRRELARCKGVSSFSE                                           |
| 191 | Tcruzi        | -----KEPLRAFGEIEFDVSSSDASKRVISLHARYNFTQFLDFARRQEMARCRGLSSFSV                                         |
| 192 |               |                                                                                                      |
| 193 |               |                                                                                                      |
| 194 | EgracilisZ1   | RIQTLTGLSKFFLIGASGVGKTCLLHRFL-TGEYRRQPSGTVGVAV-----                                                  |
| 195 | Tborrelli     | NAKLLLMKSVKVAIVGHSRVGKSMVRHFMDLYGSIRGNTRIFSPHSHHRTTSHHT                                              |
| 196 | Pserpens      | AARVLFSSSTIRVALIGPPGVGKTTSLTFL-----KKNKRGSTV-----                                                    |
| 197 | Lbrasiliensis | GARILLSSPIRVALVGPCGIGKTASVRAFL-----GEKLSQMVV-----                                                    |
| 198 | Ltarantolae   | GARILLSSPIRVALVGPCGIGKTASAHTFL-----GEKPSQMVV-----                                                    |
| 199 | Lmexicana     | AARILLSSPIRVALVGPCGIGKSACAHAF-----GEKPSQMVV-----                                                     |
| 200 | Lmajor        | GARLLLSSPIRVALVGPCGIGKTASAHAF-----GEKPSQMVV-----                                                     |
| 201 | Linfantum     | GARLLLSSPIRVALVGPCGIGKTASAHAF-----GEKPSQMVV-----                                                     |
| 202 | Bsaltans      | GAKQLLSSPIKICVVGPPGIGKTFMMKRFTGEISGDPTTIASHALSI-----                                                 |
| 203 | Tvivax        | GAHTLLSSPLKVALIGPCGARKTLMQHLVPFNQHNGRNAGSEHSET-----                                                  |
| 204 | Tcongolense   | STRTLLSSPIKIALIGPSGVGKTMLMREWV--QGGRPD TDGTSYEAS-----                                                |

```

205 Tbrucei      GMRDLLSSPIKIALIGPCGVGKTSLMREWG--RQRRPGDNSARFAVT-----
206 Tbgambiense GMRDLLSSPIKIALIGPCGVGKTSLMREWG--RQRRPGDNSARFAAT-----
207 Tcarassii    CARMLLSSPVKIAIIGPSGIGKTPMLQHFI-----GTIPLDGP-----
208 Ttheileri    GARMLLSSPLKIAIIGPTGIGKSSMVRCA-----GPHAAHTSWREP-----
209 Tgrayi       GARMLLSSPLKIAIIGPAGVVGKTLVQQFV--DQHE--NRRLAGRPL-----
210 Tcruzi       AARTLFSSPLKIAIIGSMGVGKTLVVRHFV--VSHE--NGGSSGGRI-----
211             . *: . . . : :* *:
212
213 EgracilisZ1  -----RTRPVQVTVGDPALSSPRCPPVSLTLGATP-AGPVTNLVFDASGDPRYEA
214 Tborrelli    AQLDKDGYR-----PTCGLVVS-HKRISITGEITLPQSGVII--YDVCGDSRYEK
215 Pserpens     -----H-----STMGFTRH-KVTLWTGGDSK-VGVNLEI--YDVS GDERYES
216 Lbrasiliensis -----R-----PTIGFERR-AVTVRLARGLS-TEAVLHI--YDLSGADRYRE
217 Ltarantolae -----R-----PTIGFERR-VTVRLARDLS-TEAVLHI--YDLSGADRYGE
218 Lmexicana    -----R-----PTIGFERR-AVTVRLARGLS-AEAVLHI--YDLSGADRYGE
219 Lmajor       -----R-----PTIGFERR-AVRVRLARGLS-AEAVLHI--YDLSGADRYGE
220 Linfantum    -----R-----PTIGFERR-AVTVRLARGLF-AEAVLHI--YDLSGADRYGE
221 Bsaltans     -----H-----PTCGFTTY-TKRASIVGGLT-TTATFTI--MDVAGDRRYEQ
222 Tvivax       -----Q-----PTASFQTY-EKAIHVTGGLT-ADARLQV--FDISGEKRFRE
223 Tcongolense -----V-----PAVPFNRF-EEVVHLSGGLT-ADARLQV--FDISGHPCFEE
224 Tbrucei      -----P-----PTVTFNQF-DKTVFLTGGTL-ARAQLRV--FDISGHPRFRE
225 Tbgambiense -----P-----PTVTFNQF-DKTVFLTGGTL-ARAQLRV--FDISGHPRFRE
226 Tcarassii    -----R-----ATMGFTRY-CKRVHLTGGLV-SDVMLHI--FDISGEPRYEE
227 Ttheileri    -----L-----PTMGFTRY-EKTVHLTGSLM-ADVMLHV--FDISGEPRFEE
228 Tgrayi       -----L-----PTMGFTLY-EKTVHIVGSLT-TDVRQLI--FDISGEPRFEE
229 Tcruzi       -----S-----PKLGFVRY-AKMVHLTGSLA-ADVMLHI--YDISGELRFEE
230             . : * . * :
231
232 EgracilisZ1  LLPLYVYGVQVACVFFDLTAPETLEVCAHWCRALQATLPPDVVIAICGLKGD-----
233 Tborrelli    LRALVCQSVHVIIILCYNASLKKSFIEAAVQMTSIESMLGPQPVV-MCGIIDQ-----
234 Pserpens     LRRFVCSHCHAIGLCYNPCRKVTLVQAADVMMGVEPALGPQPVV-VCGLIPRENGATDA
235 Lbrasiliensis LRRFVCRHCHAIGLCYDPSRKMTLVQAADIMMELEGALGPQSVV-VCGLVRQPPRASSSG
236 Ltarantolae LRRFICRHCHAIGLCYDPSRKVTLVQAADIMMGLESTLGPQPVV-VCGLVRPPHPSSSSG
237 Lmexicana    LRRFVCRHCHAIGLCYDPSRKVTLVQAADIMMGLESALGPQSVV-VCGLMRQPHTSSSG
238 Lmajor       LRRFVCRHCHAIGLCYDPSRKVTLVQAADIMMGLESALGPQPVV-VCGLMRQPHTSSSG
239 Linfantum    LRRFVCRHCHAIGLCYDPSRKVTLVQAADIMMGLESALGPQPVV-ICGLMRQPHTSSSS
240 Bsaltans     LRGLCAQSAHAVVVCYDTHSKMSLVHAANMMSLEPFLGPQPAV-VCGFVTD-----
241 Tvivax       LRLRILCHCHAIGLCYDPSRSTFMEAVDMIQDLVSALGPQPVV-LCGVLPQAST-----
242 Tcongolense LCRFICARCHIVVLCYDPRRRSSFVEAQEMMAKVDSALGAQPVV-VCGISPP-----
243 Tbrucei      LTRFVCASCHAVVICYDPQRKSSLMEAKAIIADVETKLGVPVI-VCGLIPP-----
244 Tbgambiense LTRFVCASCHAVVICYDPQRKSSLMEAKAIIADVETKLGVPVI-VCGLIPP-----
245 Tcarassii    LRRFICSSCHAIGLCYDARQKVTLVQAADVMMNGVEPVLGAQPVV-VCGIVPPRREHSPPA
246 Ttheileri    LRRFICSNCHAVGICYDARRKVTLVQAADIMMGVEPALGPQPVV-VCGIMGPTNTNTNTD
247 Tgrayi       LRRLLCSNCHAIGICYDARRKVTLVQAADVMMVEPTLGPQPTV-VCGIVRPPAAAAA--
248 Tcruzi       LRRFLCSNCHAVGLCYDPRRKFTLVQAADVMMGVEPALGPQPVV-VCGILCPAEPARQD-
249             * : : : : : * : : : **
250
251 EgracilisZ1  -----
252 Tborrelli    -----
253 Pserpens     SSTVPKNIGNGLND-----TRLDLRVSQTAHQRPDTLPAVSFTTLATASSEASSRSQ
254 Lbrasiliensis SVPLDCHKADPTHLSTTM---TALHLSTLPKREGQSLQSLPVDPAVPV--STGALTGELM
255 Ltarantolae  RAPLNHHKEGSTRLPAVSSVAALKFSAPSKREDENSDSLPVVSTKPEAEAAGIVSDDWI
256 Lmexicana    SVPLNRPRVVPARLPAVVSAVTALSASPKREARSHSVLVGSVESEAGAAGGVADESM
257 Lmajor       SVPLNYHRAGPARLPAVVSAVTAVGLSAPLVRRDQSSHAVPVGSAESAAEAAGGVAGESM
258 Linfantum    SAPLHHHRAGPARFPAVVSAAATLNL SAPPKKEDECSHSMVGSAAEAE--AAGGVAGESM
259 Bsaltans     -----
260 Tvivax       -----
261 Tcongolense -----
262 Tbrucei      -----
263 Tbgambiense -----
264 Tcarassii    A-----
265 Ttheileri    EIPTTTTNTNTNSNS-----
266 Tgrayi       -----
267 Tcruzi       -----
268
269
270 EgracilisZ1  -----
271 Tborrelli    -----
272 Pserpens     GSTVASATATREATSSPLKSVHPACGAMVWGAGG-----

```

```

273 Lbrasiliensis LATPLCGVSNNGTKTPLQSSSSSTSTARLSGVTAESNGDQSDRLQVNTATSTMALLRAV
274 Ltarantolae LAAPLFGATNGCSALHQTKRSRAGIATTLPGGGGEGVDHNNGGPLQADAAISPI-----
275 Lmexicana LAATMCGVANGCNTSLQASSCPASAAVALHGVVAENCDHESCDRLQADAAVSPV-----
276 Lmajor LAAPICGVANGCNTSPRASSSPAGTAVTLPGGMAENGAHESCDRLQADAAVSPM-----
277 Linfantum GAAPMCGAANGCNTPPQASSSPAGTAVRLPGVVAENGGHESCDGLQDDAAVSPV-----
278 Bsaltans -----
279 Tvivax -----
280 Tcongolense -----
281 Tbrucei -----
282 Tbgambiense -----
283 Tcarassii -----
284 Ttheileri -----
285 Tgrayi -----
286 Tcruzi -----
287 -----
288 -----
289 EgracilisZ1 -----AAHRKVDAHTLAQFPVVRPDVRFECALADRGVGSFFFEACV
290 Tborrelli -----TNNNNNKEVTESDASQITPRCKASIQIYSHNAK---VAFESAI
291 Pserpens -----SHSSRSEGLTPPRLSLSIEVSEEDAAGITVRDGGSLHCPIDQMH---VFYDRL
292 Lbrasiliensis PLSSTTPAPALPPFTTATSSSGSLEVSAEDAVGITVRGHSSIQCLLHPT---PFFEAVV
293 Ltarantolae -----LSPRSRPFTMASPHVSALEVSVEDAVGITVRGHSSIHCPLLHPT---PLFEALV
294 Lmexicana -----PSPAPPPFTIASPHSSALEVSVNDAVGITVRGHSSIHCPLLHPT---PLFEALV
295 Lmajor -----PSPPQPPFAVASPQSRALVSVEDAVGITVRGHSSIHCPLLHPT---PLFEALV
296 Linfantum -----PSPTPPPFTIASPQSSVLEVSVEDAVGITVRGHSSIHCPLLHPT---PLFEALV
297 Bsaltans -----SQRKRETVSGAEGITVRCRASIQT--NHAD---EIFEAVL
298 Tvivax -----MVGRHDVPPLEVGESQDVGGEWQSGSLRCPYDRGD---LLFQRIV
299 Tcongolense -----VSRNRGAVEFEVTKEEARAASRERGSVQCSWAKSE---VLFESVV
300 Tbrucei -----ADAGRGSVAEVSAAEEATEISSRERGSLLCAWHEGK---ILFEHVV
301 Tbgambiense -----ADAGRGSVAEVSAAEEATEISSRERGSLLCAWHEGK---ILFEHVV
302 Tcarassii -----HHRSPDALEAPEEGLPVREVKEVHAEGITVRGRGSVQCAWNRSE---RVFQTLV
303 Ttheileri -----NTNSTATTMATPIAVSEPAVQEIHAMGITVRGRASLQCQWNNSE---PLFQSL
304 Tgrayi -----QEIGEKGAPLEVSEVHARDITVRGRGSLQCAWDKGE---MLFQKLV
305 Tcruzi -----LHEAGTQELEVTEVDASGITVRGRGSLQCAWDNSE---CLFQQLV
306 -----* . . . : :
307 -----
308 EgracilisZ1 TACVQKIVQSP-----SAAVP--
309 Tborrelli QVLDRLMIGG-----
310 Pserpens CSLIDRLSLAAMANRTSIANLTDAEE-----SESNKFSGVSATNSSRT-F
311 Lbrasiliensis QSVLDRLVEATVASTSTISEISAVLAMQSGGSGRRNSSTCSAGSLSAGSAPRSTIQAS-S
312 Ltarantolae QSVLDVLEATVAST-----DLTMHGNGNSSQSFPTCHPSSLNNGRASTAMRVT-S
313 Lmexicana QSVLDLLVEATVASTSTISDIAELTMHGSASGAQSFPTSCPSSLSAGSPASAMRVA-S
314 Lmajor QSVLDLLVEATVASTSTISEISAELETHGSGSGPQSFPTCCPSSLSAGSAPANATRVA-S
315 Linfantum QSVLDLLVEATVASTSTISEISAGLETHGSGSGPQSFPTCCPSSLSAGSAPANATRVA-S
316 Bsaltans QTLLDRLVLTAT-----ATAAAASPASKLGA--
317 Tvivax QCLLDRIALAT-----SVVSFNPSNSSCIP-N
318 Tcongolense QCLLDRIALGT-----SALPFSPSVRSSGEY-V
319 Tbrucei QCLLDICIALGT-----SAISFTAPVSPLGVP-V
320 Tbgambiense QCLLDICIALGT-----SAISFTAPVSPLGVP-V
321 Tcarassii QCLLDRLSLAT-----STAAGVRVST-----E
322 Ttheileri QSLLDRLAMAT-----ATSSVVAASNGRAKI
323 Tgrayi QCLLDRLALAT-----TTSSVIATTTPTGRVRR
324 Tcruzi QSLLDRLAMAT-----ATSSVVAASNTALLA-G
325 : : .
326 -----
327 EgracilisZ1 -----PPPNSTPVD--
328 Tborrelli -----RQSHELISLTTNPSVFDLLID--
329 Pserpens AKRDPKVDKVI AEELLKLTMQPSTLNILLDR-
330 Lbrasiliensis VRRRPHASRAIVQDLLNLTMQPCALDILLDRK
331 Ltarantolae ARRRPHASRAIMEDLLNLTMQPCSLDILLDRK
332 Lmexicana TRRRPKASRAIMEDLLNLTMQPCALDILLDRK
333 Lmajor TRRRPHASRAIMEDLRNLTMQPCALDILLDRK
334 Linfantum TRRRPHASRAIMEDLLNLTMQPCALDILLDRK
335 Bsaltans -----AAARTAAQELLEISSNPSVMDVLLDGK
336 Tvivax EGAFSVTNHTAAHELLKISTTPSPIDVLIN--
337 Tcongolense THEEPLANRTVAQELLQITVCPSAIDILLN--
338 Tbrucei DSEEFVNRSTAQELLRITMCPSAIDVLLD--
339 Tbgambiense DSEEFVNRSTAQELLRITMCPSAIDVLLD--
340 Tcarassii DEKERVANRTAAELQLTLNPSAIDVLLD--

```

---

|     |           |                                  |
|-----|-----------|----------------------------------|
| 341 | Ttheileri | DEKESATNLAVAQELLRITLNPSALDILLE-- |
| 342 | Tgrayi    | DERETSMNLNVAQELLQITMQPSPLDVLL--- |
| 343 | Tcruzi    | DEKEATVNCNIAQELLRITLDPSPLDVLMSDN |
| 344 |           | * . :                            |



**Table S1: Synthetic oligonucleotides used in this study.** All sequences are written with the 5' end left-most, and where relevant restriction endonuclease sites are underlined.

| <b>Designation</b>    | <b>Sequence</b>                                                                                             | <b>Purpose</b>                    |
|-----------------------|-------------------------------------------------------------------------------------------------------------|-----------------------------------|
| qRT For:              | GCCAAACCGACAATTTCACT                                                                                        | qRT-PCR                           |
| qRT Rev:              | CTCCCGCATTAAATGACGTTT                                                                                       | qRT-PCR                           |
| $\beta$ -tubulin For: | CAAGATGGCTGTCACCTTCA                                                                                        | qRT-PCR                           |
| $\beta$ -tubulin Rev: | GCCAGTGTACCAGTGCAAGA                                                                                        | qRT-PCR                           |
| TbFRP-RNAi-A For:     | GAGCGGGAGATGGGTAATGG                                                                                        | qRT-PCR                           |
| TbFRP-RNAi-A Rev:     | TGAACTCCGAGTTTCGTCTC                                                                                        | qRT-PCR                           |
| TbFRP-RNAi-B For:     | GAAGAGCGGGAGATGGGTAAT                                                                                       | qRT-PCR                           |
| TbFRP-RNAi-B Rev:     | TGTGGGGTTCATAAACTGGA                                                                                        | qRT-PCR                           |
| TbFRP For:            | GCCAAAGCTTATGGATCATATTGATCTTGC                                                                              | Ectopic expression of TbFRP       |
| TbFRP Rev:            | GCTAGGGCCCGTCCAATAGCACGTCAATAGC                                                                             | Ectopic expression of TbFRP       |
| TbFRP-FYVE Rev:       | GCGGGCCCCACAACAAGCTGTACTTCATAG                                                                              | Ectopic expression of FYVE domain |
| TbFRP-FYVE-Fbox Rev:  | GCGGGCCC GGCAGCACCTGCGGATG                                                                                  | Ectopic expression of FYVE domain |
| TbFRP Tag For:        | GTTCTCCGTCAACCGCTCAACAGCGCAGGAGCTATTGCGAATT<br>ACGATGTGCCCATCGGCTATTGACGTGCTATTGGACGGTACCG<br>GGCCCCCCTCGAG | Genomic tagging of TbFRP          |
| TbFRP Tag Rev:        | CACAAACCCAGCTGGCAAATAGTAAAACGGTACTTGTCCA<br>CACAACAAATTACCTCATTCCAACCATGTATGGCGGCCGCTCT<br>AGAACTAGTGGAT    | Genomic tagging of TbFRP          |



**Table S2: Number of amino acid residues between RrHHCR + 10 and RVC motifs in FYVE Domains**

| Gene ID                | Tb09.160.3480 | Tb09.211.1970 | Tb02.211.2990 | Tb10.05.0240 | Tb927.7.1840 | Tb927.7.1880 | Tb11.01.6980 | Tb11.01.7720 |
|------------------------|---------------|---------------|---------------|--------------|--------------|--------------|--------------|--------------|
| <b>Species</b>         |               |               |               |              |              |              |              |              |
| <i>T. brucei</i>       | 16            | 16            | 16            | 13           | 16           | 16           | 23           | 21           |
| <i>T. b. gambiense</i> | 16            | 16            | 16            | 13           | 16           | 16           | 23           | 21           |
| <i>T. cruzi</i>        | 00            | 16            | 16            | 14           | 16           | 16           | 23           | 21           |
| <i>T. vivax</i>        | 16            | -             | 16            | 14           | 16           | 16           | 23           | -            |
| <i>T. congolense</i>   | 16            | 16            | 16            | 13           | 16           | 16           | -            | 21           |
| <i>L. major</i>        | 16            | 16            | -             | 14           | -            | -            | 23           | -            |
| <i>L. mexicana</i>     | 16            | 16            | 16            | 14           | -            | -            | 23           | -            |
| <i>L. braziliensis</i> | 16            | 16            | 16            | 14           | -            | -            | 23           | -            |
| <i>L. infantum</i>     | 16            | 16            | -             | 14           | -            | -            | 23           | -            |

| Gene ID                | Tb10.61.0730 | Tb11.47.0002 | Tb927.7.690 | Tb927.7.3790 | Tb937.7.530 |
|------------------------|--------------|--------------|-------------|--------------|-------------|
| <b>Species</b>         |              |              |             |              |             |
| <i>T. brucei</i>       | 118          | 29           | 59          | 68           | 17          |
| <i>T. b. gambiense</i> | -            | 29           | 63          | 68           | 17          |
| <i>T. cruzi</i>        | 107          | 29           | 65          | 83           | 17          |
| <i>T. vivax</i>        | 107          | 29           | 78          | 71           | 17          |
| <i>T. congolense</i>   | 107          | 29           | -           | 68           | 17          |
| <i>L. major</i>        | 119          | 70           | -           | 127          | 36          |
| <i>L. mexicana</i>     | 119          | 70           | -           | 129          | 36          |
| <i>L. braziliensis</i> | 119          | 71           | -           | 127          | 36          |
| <i>L. infantum</i>     | 118          | 70           | -           | -            | 36          |

| Species        | Rn | Bt | Hs | Mm | Am | Cb | Ce | Dm | Bf | Pi  |
|----------------|----|----|----|----|----|----|----|----|----|-----|
| <b>Protein</b> |    |    |    |    |    |    |    |    |    |     |
| Rabenosyn-5    | 59 | 59 | 59 | 59 | 59 | 92 | 98 | 32 | 62 | -   |
| PIK-D          | -  | -  | -  | -  | -  | -  | -  | -  | -  | 129 |

**Key:** Rn (*Rattus norvegicus*), Bt (*Bos taurus*), Hs (*Homo sapiens*), Mm (*Mus musculus*), Am (*Ailuropoda melanoleuca*), Cb (*Caenorhabditis briggsae*), Ce (*Caenorhabditis elegance*), Dm (*Drosophila melanogaster*) Bf (*Branchiostoma floridae*), Rn (*Rattus norvegicus*) and Pi (*Pichia pastoris*).
